# Supplementary material for: Computer model of a spectrum analyzer for a virtual laboratory: development and introduction to the educational process
Source: PeerJ Comput Sci. 2022 Nov 3;8:e1130. doi: 10.7717/peerj-cs.1130 (PMC9680885; doi:10.7717/peerj-cs.1130)
Supplement: Supplemental Information 1 — The answers of our respondents after use of the application. [file peerj-cs-08-1130-s001.xlsx]

## Sheet:  Sheet1
E-mail address	How convenient is the placement of interface elements on the screen?	How comfortable is it for you to read the text displayed on the screen?	How satisfied are you with the app's color scheme?	Do you find it difficult to understand the prompts displayed on the screen?	How do you rate the app interface in general?	Information about working with the application is always available.	The user manual is clear and easy to use.	The names of the commands in the application have a clear meaning.	Error messages are helpful.	Error messages are informative.	The application has an EXIT button.	The application has a HELP button.	The application has a RESTART button.	I understand the sequence of actions in the application required to complete the work.	I understand the possibilities and limitations of the program.	I understand what this or that button/command does.	I can easily work with the application after getting acquainted with the functionality.	The application helps to better absorb the material.	The processes shown in the application correspond to the real processes.	After using the application, the studied material became more understandable	I learned the information better after using the app	Word order in menus, instructions, etc. is clear.	The order of the options in the menu is logical.	The names of the commands reflect their essence.	You can go to the higher level menu by pressing just one button.	The app helps me learn the material better.	Is the app useful?	The app does what I expected	The application allows me to control its operation.	The application simplifies the execution of the processes I need.	The app helps me learn the material better.	Is the app useful?	The app is perfect for me	The application works as I would like	I would recommend the app to friends/acquaintances	What I liked the most about the app	What I liked the least about the app
part	5	5	5	5	5	4	3	4	5	5	YES	NO	NO	4	4	5	5	5	5	5	5	4	4	5	4	5	5	4	4	4	5	5	4	4	3	Demonstration of the principle of operation of the MCA	detailing
part 1	4	5	5	2	5	5	5	5	5	5	YES	YES	YES	5	5	5	5	5	5	5	5	5	5	5	5	5	5	5	5	5	5	5	5	5	5	Design	freezes
part 2	5	5	5	4	4	5	5	5	5	5	YES	NO	NO	5	5	5	5	5	5	5	5	5	5	5	5	5	5	5	5	5	5	5	5	5	5	satellite	-
part 3	5	4	5	5	5	5	5	5	5	5	YES	NO	NO	5	4	5	5	5	5	5	5	5	4	5	3	5	5	4	5	5	5	5	5	3	5	Simple program interface	the color of the numbers blends slightly with the background
part 4	5	4	5	3	5	5	5	5	5	5	YES	YES	NO	5	5	5	5	5	5	5	5	5	5	5	5	5	5	5	5	5	5	5	5	5	5	really liked the realistic graphics, the expansion and the image is very beautiful and attracts attention from the first second.	in general, everything is super, you can work a little on the text size in notifications.
part 5	5	5	5	5	5	5	5	5	5	5	YES	YES	YES	5	5	5	5	5	5	5	5	5	5	5	5	5	5	5	5	5	5	5	5	5	5	Image))))	Everything is great!
part 6	5	5	5	5	5	5	5	5	5	5	YES	YES	YES	5	5	5	5	5	5	5	5	5	5	5	5	5	5	5	5	5	5	5	5	5	5	The picture is super, chic)	-
part 7	4	5	5	5	5	4	4	5	5	5	YES	NO	NO	4	4	4	5	5	4	4	4	4	5	5	3	5	5	3	3	3	5	5	5	4	5	overall nice interface, idea	the application opened for a long time, my calculation was not made, since it was not checked for antivirus, Windows barely started
part 8	4	3	4	4	4	3	3	3	3	5	YES	YES	YES	4	4	4	4	4	4	4	4	4	4	4	4	4	4	4	4	4	4	4	4	4	4	Picture clarity, quality	You can make an improvement, see the internal construction of the satellite, additional space components
part 9	5	4	5	5	5	5	5	5	5	5	YES	YES	YES	5	5	5	5	5	5	5	5	5	5	5	5	5	5	5	5	5	5	5	5	5	5	The program is good, the image extension is very nice	-
part 10	1	4	2	4	1	4	4	4	1	1	YES	NO	NO	4	5	4	5	3	3	4	4	3	4	4	5	4	4	3	4	4	4	4	1	2	1	Automatic data calculation	Optimization, functionality, design, image output correctness
part 11	5	5	4	5	5	4	5	4	5	5	YES	YES	YES	4	5	5	4	5	5	4	4	4	5	5	5	5	5	5	5	5	5	5	5	5	5	Uniqueness	All liked it
part 12	3	5	5	4	4	4	2	4	2	2	YES	NO	NO	1	3	4	3	5	5	4	4	1	1	5	5	5	5	5	5	5	5	5	2	4	4	simulation and calculation	there is no logic, it is not clear what they want
part 13	4	3	4	4	4	4	4	4	3	3	YES	NO	NO	4	4	4	4	5	5	4	4	4	4	4	4	5	5	3	4	5	5	5	4	3	4	Possibility to switch camera	I would like the font and text to be clearer, merges a little with the background
part 14	4	4	4	4	4	4	4	4	4	5	YES	YES	NO	4	4	4	4	3	4	4	4	4	5	5	5	4	4	4	4	4	4	4	4	4	4	...	..
part 15	5	5	5	5	5	5	5	5	5	5	YES	YES	YES	5	5	5	5	5	5	5	5	5	5	5	5	5	5	5	5	5	5	5	5	1	5	Interface	Application operation
part 16	5	5	5	4	5	4	5	5	5	5	YES	NO	NO	5	5	5	5	5	5	5	5	5	5	5	4	5	4	4	3	5	4	5	4	4	5	It is interesting to work in the program, to physically see the movement of the satellite around the earth.	There is no way out back to the view of the satellite from the ground-based RS, because of this, it was necessary to re-calculate and find the coordinates of the RS. The second problem is that from the first launch of the MCA, the coordinates are not calculated, you need to run the MCA 2-3 times to get the coordinates. Some files of the program are blocked by the antivirus, because of this, the p…
part 17	4	3	4	4	4	4	4	4	5	4	YES	YES	NO	4	3	4	4	2	3	4	5	4	4	5	3	4	4	3	3	3	4	4	3	4	4	everything is clear in the program, but it works slowly,	works well, but there are a couple of minuses. That is, there is no minus button, then there is no scale in the program, but in general it is well thought out
part 18	3	2	4	3	5	2	3	3	5	5	YES	NO	NO	3	3	5	4	3	3	4	4	4	4	5	4	5	5	3	4	3	5	5	3	1	5	If everything is correct, you will see the message everything is correct on the screen.	There are no functions like help, back, help and a button to select IRI by yourself
part 19	1	1	3	4	2	3	3	2	4	4	NO	NO	NO	5	4	5	5	2	3	4	3	4	3	5	5	4	4	2	1	3	4	4	2	2	4	Simplicity, speed	Back button placement, zoom, save, Make it so every work done can be saved
part 20	5	5	5	5	4	5	5	5	5	5	YES	YES	NO	5	5	5	5	5	5	5	5	5	5	5	5	5	5	5	5	5	5	5	1	1	3	Interface	Recommendations: 1) There is no Back button in the application 2) You can add the Zoom function to the program 3) The application freezes a lot and sometimes does not work on the first try 4) You can create a log for the values used
part 21	5	5	5	5	5	5	5	5	5	5	YES	YES	YES	5	5	5	5	5	5	5	5	5	5	5	5	5	5	5	5	5	5	5	5	5	5	I liked the review app, everything is interesting there	With the help of this application, we saw space and everything was interesting to observe there, but my laptop is frozen and the application is too heavy for my laptop and I wanted to reduce the system requirement and thanks for your attention
part 22	4	5	5	4	4	4	4	4	4	5	YES	YES	YES	4	4	4	4	3	3	4	4	4	4	4	4	4	4	4	4	4	4	4	4	4	4	graphic arts	in that there is no zoom in and out button, there is also no back button, in addition, you can’t expand the application and hide it to see another document, and you want a full anti-virus scan, and that there is a function to save the current file button (save as)
part 23	5	4	5	4	4	4	4	4	4	4	NO	NO	NO	4	4	4	4	3	2	2	2	2	5	3	5	1	3	1	3	3	2	5	2	5	5	Animation implementation, the ability to enter the initial data.	Search duration, speed
part 24	4	5	5	3	5	5	4	4	4	4	YES	YES	YES	4	4	4	3	4	2	4	4	4	4	4	4	4	5	4	4	4	4	4	4	4	4	Everything suits me	Difficulty downloading on mac
part 25	5	4	4	5	3	5	4	4	4	3	YES	YES	YES	4	4	3	4	3	4	4	4	5	4	4	4	4	5	4	4	4	4	4	5	4	4	¯\_(ツ)_/¯	No back button
part 26	4	4	4	3	3	3	3	4	5	4	YES	YES	YES	4	4	4	4	3	3	4	4	4	4	4	4	5	5	4	4	4	4	4	4	4	4	For Convenience	Old interface
part 27	4	5	5	4	4	5	4	4	4	4	NO	YES	NO	4	5	4	3	5	5	5	4	4	5	4	5	5	5	4	5	4	4	5	5	5	4	I myself am interested in conducting such experiments with different applications.	no minus
part 28	5	5	5	5	5	5	5	5	5	5	YES	YES	YES	5	5	5	5	5	5	5	5	5	5	5	5	5	5	5	5	5	5	5	5	5	5	The user manual is clear and easy to use.	Yes
part 29	4	4	4	4	4	4	4	4	4	4	YES	YES	NO	4	4	4	4	4	4	4	4	4	4	4	4	4	4	4	4	4	4	4	4	4	4	-	-
part 30	5	5	5	5	4	5	5	5	5	5	YES	YES	YES	5	5	5	4	5	5	5	5	5	4	5	3	5	5	5	5	5	5	5	5	5	5	Convenience	…
part 31	4	5	5	4	3	4	3	4	4	4	NO	YES	YES	5	5	5	5	5	5	5	5	3	4	4	5	5	5	4	4	5	5	5	5	4	5	The ability to see the movement of the IRI thanks to the model, the laconic design of the program, the ability to enter your own input parameters.	Incomprehensible icons for the team, I think it would be possible to add a name to them or make a general menu, also add the display of certain locations by coordinates to the animation.
part 32	5	5	5	5	5	5	5	5	5	5	YES	NO	YES	5	5	5	5	5	5	5	5	5	5	5	5	5	5	5	5	5	5	5	5	5	5	The idea of creating an application is more than good! The application is designed as a game, we can use it in practice, what we will do tomorrow, just like at work!	The apps still need more features!
part 33	3	3	3	3	3	3	5	3	3	4	YES	NO	NO	4	3	3	4	2	2	4	5	3	3	4	4	3	4	3	4	4	3	5	3	4	3	All	Nothing
part 34	4	3	4	4	4	5	4	4	5	5	YES	NO	NO	2	3	4	5	5	5	5	5	4	4	5	3	5	5	5	5	5	5	5	4	3	5	What I liked most about this application is that you can use the studied material in practice, such parameters as the scanning angle and the direction finding angle have become more understandable. From myself, I would like to advise you: 1) optimize the application (sometimes it freezes a lot) 2) add instructions for using the application.	Design (for an amateur), colors (sometimes the font merges with the background))
part 35	4	4	2	3	3	3	4	5	5	3	YES	NO	NO	2	4	5	5	5	5	5	5	4	4	5	4	5	5	5	5	5	5	5	5	5	5	That it is understandable on an intuitive level includes the practical study of the topics that we are now going through. After using this program, I became even more interested in this subject, went to the library, took a textbook on STS to know this subject better, I think that this is a very useful application in this area, and I wanted more such laboratory work, where we study everything in p…	Design, font, control, you do not always understand the sequence of actions, there is no intuitive control so that a user without special knowledge can use this application
part 36	5	4	3	1	3	5	5	5	3	3	YES	YES	NO	2	5	4	4	5	3	4	4	5	2	5	1	4	4	3	3	3	4	5	3	2	4	visual representation	Why two exit buttons? The application is very useful and everything is written in a readable and accessible language, but the interface can be worked on. We are still an IT university, the application interface looks like it was from the days of Windows XP. I think we have an excellent composition at the university and we can improve it. In terms of functionality, everything is excellent. I think…
part 37	4	4	4	3	4	5	5	4	3	4	YES	YES	YES	5	5	5	5	5	5	5	2	5	5	5	5	5	5	5	5	5	5	5	5	5	1	That it helps to easily and simply master the material	What needs to work
part 38	5	5	5	5	5	5	5	5	5	4	YES	YES	YES	5	5	4	4	4	5	5	5	5	3	4	4	5	5	4	5	4	4	4	4	4	4	very useful app i like it	Easy to work with the application, I liked everything
part 39	3	4	3	4	3	4	4	4	4	4	YES	NO	NO	3	4	4	3	3	3	5	5	4	4	4	3	4	4	4	4	4	5	5	5	4	4	Learned material can be put into practice	The interface is not entirely clear at first glance and needs to be sorted out
part 40	4	4	5	3	4	3	4	3	5	5	YES	YES	NO	3	2	3	5	5	3	5	5	3	3	4	5	5	5	3	3	4	5	5	4	3	4	Interface	Command Functions
part 41	4	5	5	5	3	5	5	5	5	4	YES	NO	NO	5	5	5	5	4	4	5	5	5	4	5	5	5	5	4	5	5	5	5	4	4	5	Interface appearance	Limited functionality
part 42	5	5	4	2	5	4	3	3	5	5	YES	NO	NO	4	4	4	5	5	5	5	5	5	5	5	4	4	5	4	5	5	5	5	4	4	5	color scheme at application startup, background when switching to a submenu, animation and simulation of MKA launch, MKA camera switching, graphics, speed	The fact that the application is launched in full screen mode could not be done in half screen (Minimize to window). I think it would be more convenient to sometimes combine with other windows if another window is open to enter data from another open application or vice versa. The background color of the window when you click on the "Menu" is too light, because before that the application is disp…
part 43	4	5	5	4	4	4	5	5	4	5	YES	YES	NO	5	4	5	5	4	2	4	5	5	5	5	5	4	5	3	4	5	4	5	4	3	5	A visual representation of the movement of a satellite around the earth.	It is not convenient to work with something other than the application. The application always minimizes when I try to open some document on the second screen. Too uncomfortable to switch.
part 44	5	5	5	5	5	5	5	5	5	5	YES	NO	NO	5	5	5	5	5	5	5	5	5	5	5	5	5	5	5	5	5	5	5	5	5	5	For this application, I can recommend that the satellite determines not the coordinates of the station, but the location coordinates of the smartphone that the person will be holding, so the application can show the virtual operation of GSM technology. But, of course, implementation will be difficult because GSM technology will need more than one satellite, at least 24.	...
part 45	4	4	3	4	3	4	4	4	5	4	YES	YES	NO	4	4	4	4	4	4	4	4	4	4	4	4	4	4	4	4	4	4	4	4	4	4	Realistic, you can see a lot of details	Management is a bit awkward, but everything is fine
part 46	5	4	3	3	3	3	4	3	4	4	YES	NO	NO	3	5	5	5	3	4	5	5	5	4	5	5	5	5	5	5	5	5	5	5	5	5	Yes	Not
part 47	4	5	5	4	4	4	4	5	4	4	YES	YES	NO	5	5	5	5	5	5	5	5	5	5	5	4	5	5	5	5	5	5	5	3	3	4	I liked the interface and graphics + animations in this program	The optimization of the application is very bad, the CPU is very loaded, like a light program, but the optimization is lame) After the program, the laptop becomes an iron)
